# Supplementary material for: Do patients’ preferences prevail in hospital selection?: a comparison between discrete choice experiments and revealed hospital choice
Source: Springer Nature journal article supplement (doi:10.1186/s12913-022-08403-6), 2022-09-08
Supplement: MOESM1 [file 23468026]

## **SUPPLEMENTARY MATERIAL 1.**

**Example choice set, DCE breast cancer**

Imagine the following situation:

- You have been told by your GP you need hospital care to treat breast cancer.
- You may only choose between hospital A or hospital B.
- Both hospitals are practically identical (e.g., travelling facilities options such as a bus stop located nearby, and the number of parking places are the same for both hospitals), and thus differ only in characteristic presented.

For each situation:

- 1) Compare both hospitals according to each attribute presented.
- 2) Given the information presented, in which hospital would you like to be treated?
- 3) Please indicate at the bottom in which hospital would you prefer to be treated.

It is important to note that your decision is never considered right or wrong.

| Hospital:                                                                                                                                                                                                                                                                | Hospital A           | Hospital B                |
|--------------------------------------------------------------------------------------------------------------------------------------------------------------------------------------------------------------------------------------------------------------------------|----------------------|---------------------------|
| <b>1. Patient experiences</b><br>The level that other patients are satisfied with the attention, explanation and time received from the hospital staff.<br>Higher values reflect better scores.                                                                          | Below average        | Average                   |
| <b>2. Clinical outcome indicator</b><br>An indicator of hospital quality that reflects the share of resections for which the tumor resection margin was shown to be tumor-positive in the first surgery in breast saving therapy.<br>Lower values reflect better scores. | 10%                  | 5%                        |
| <b>3. Waiting time</b><br>The number of working days you have to wait until the first appointment.                                                                                                                                                                       | 5 working days       | 15 working days           |
| <b>4. Travel distance</b><br>The number of kilometers from your home to the hospital.                                                                                                                                                                                    | 15 kilometers        | 8 kilometers              |
| <b>5. Recommendation</b><br>The person or persons who recommends you the given hospital.                                                                                                                                                                                 | Nobody in particular | Your General Practitioner |
| In which hospital would you prefer to be treated?                                                                                                                                                                                                                        |                      |                           |
