# Supplementary material for: Do patients’ preferences prevail in hospital selection?: a comparison between discrete choice experiments and revealed hospital choice
Source: Springer Nature journal article supplement (doi:10.1186/s12913-022-08403-6), 2022-09-08
Supplement: MOESM3 [file 23468026]

## **SUPPLEMENTARY MATERIAL 3**

### **Results of additional analyses**

**Table 7. Results of mixed logit models (4-attributes analyses)**

|                               |                                             | Breast cancer |                 |         | Cataract |                 |         |
|-------------------------------|---------------------------------------------|---------------|-----------------|---------|----------|-----------------|---------|
|                               |                                             | Beta          | SE <sup>a</sup> | P value | beta     | SE <sup>a</sup> | P value |
| ASC <sup>b</sup>              |                                             | 0.607         | 0.050           | <0.01   | 0.553    | 0.046           | <0.01   |
| Attributes                    |                                             |               |                 |         |          |                 |         |
| 1) Patient experiences        | Below average (ref.)                        |               |                 |         |          |                 |         |
|                               | Average                                     | 0.610         | 0.066           | <0.01   | 0.912    | 0.054           | <0.01   |
|                               | Above average                               | 1.172         | 0.062           | <0.01   | 1.058    | 0.059           | <0.01   |
| 2) Clinical outcome indicator |                                             |               |                 |         |          |                 |         |
| Breast cancer:                | Tumor-positive resection margin (in %)      | -0.123        | 0.007           | <0.01   |          |                 |         |
| Cataract:                     | Per-operatively performed vitrectomy (in %) |               |                 |         | -2.305   | 0.104           | <0.01   |
| 3) Waiting time               | (In working days)                           | -0.047        | 0.003           | <0.01   | -0.015   | 0.002           | <0.01   |
| 4) Travel distance            | 3 km (ref.)                                 |               |                 |         |          |                 |         |
|                               | 8 km                                        | -0.231        | 0.054           | <0.01   | -0.138   | 0.051           | <0.01   |
|                               | 15 km                                       | -0.304        | 0.053           | <0.01   | -0.606   | 0.065           | <0.01   |
| 5) Recommendation             | Nobody (ref.)                               |               |                 |         |          |                 |         |
|                               | Friends and Family                          |               |                 |         |          |                 |         |
|                               | GP                                          |               |                 |         |          |                 |         |

|                                   |                                             |          |       |       |          |       |       |
|-----------------------------------|---------------------------------------------|----------|-------|-------|----------|-------|-------|
| SD of random parameters           |                                             |          |       |       |          |       |       |
| 1) Patient experiences            | Average                                     | -0.538   | 0.104 | <0.01 | 0.068    | 0.075 | 0.36  |
|                                   | Above average                               | -0.492   | 0.127 | <0.01 | -0.763   | 0.077 | <0.01 |
| 2) Clinical outcome indicator     |                                             |          |       |       |          |       |       |
| Breast cancer:                    | Tumor-positive resection margin (in %)      | 0.167    | 0.009 | <0.01 |          |       |       |
| Cataract:                         | Per-operatively performed vitrectomy (in %) |          |       |       | 2.367    | 0.112 | <0.01 |
| 3) Waiting time (in working days) |                                             | -0.061   | 0.003 | <0.01 | -0.028   | 0.003 | <0.01 |
| 4) Travel distance                | 8 km                                        |          |       |       | -0.351   | 0.139 | 0.01  |
|                                   | 15 km                                       |          |       |       | -1.037   | 0.095 | <0.01 |
| 5) Recommendation                 | Friends and Family                          |          |       |       |          |       |       |
|                                   | GP                                          |          |       |       |          |       |       |
| Number of individuals             |                                             | 631      |       |       | 1109     |       |       |
| Number of observations            |                                             | 6304     |       |       | 10980    |       |       |
| Model fit                         | Log-likelihood                              | -3084.83 |       |       | -5002.35 |       |       |
|                                   | BIC                                         | 6265.90  |       |       | 10125.65 |       |       |

All random parameters were assumed to be normally distributed and were simulated using on 5,000 Modified Latin Hypercube Sampling draws. <sup>a</sup> = reflects bootstrapped standard errors. <sup>b</sup> = coded as 1 for the first (left) alternative and 0 for the second alternative. The coefficient reflects the utility derived from any given hospital presented on left hand side of the choice set and thus accounted for any left-to-right bias. ASC = alternative specific constant. BIC = Bayesian information criterion. GP = General Practitioner. KM = kilometer. NA = not available. Ref. = Reference. SD = Standard deviation. SE = Standard error.

**Table 8. Marginal rate of substitution (4-attributes analyses)**

|                                                                                                                                                                            | Breast cancer                                  |                                               | Cataract                                       |                                               | Interpretation                                                                                                             |
|----------------------------------------------------------------------------------------------------------------------------------------------------------------------------|------------------------------------------------|-----------------------------------------------|------------------------------------------------|-----------------------------------------------|----------------------------------------------------------------------------------------------------------------------------|
|                                                                                                                                                                            | Marginal willingness to wait (in working days) | 95%CI (lower bound; upper bound) <sup>a</sup> | Marginal willingness to wait (in working days) | 95%CI (lower bound; upper bound) <sup>a</sup> | To select a hospital that...                                                                                               |
| Attributes                                                                                                                                                                 |                                                |                                               |                                                |                                               |                                                                                                                            |
| 1) Patient experiences                                                                                                                                                     | 15.8                                           | (12.8-18.9)                                   | 73.0                                           | (55.0-91.0)                                   | ... scored above average on patient experiences instead of a hospital that scored below average on patient experiences.    |
| 2) Clinical outcome indicator                                                                                                                                              | 38.8                                           | (33.3-44.2)                                   |                                                |                                               | ... reported a 5% score on the 'tumor-positive resection margin' indicator instead of a hospital with a 20% score.         |
|                                                                                                                                                                            |                                                |                                               | 204.5                                          | (155.6-253.3)                                 | ... reported a 0.4% score on the 'per-operatively performed vitrectomy' indicator instead of a hospital with a 1.7% score. |
| 4) Travel distance                                                                                                                                                         | 3.5                                            | (1.2-5.8)                                     | 39.1                                           | (27.3-50.9)                                   | ... was located 3 km away from their home instead of a hospital located 15 km away.                                        |
| 5) Recommendation                                                                                                                                                          |                                                |                                               |                                                |                                               | ... was recommended by their GP instead of a hospital that was not recommended by anyone in particular.                    |
| <sup>a</sup> = computed using robust standard errors.<br>95%CI = 95% Confidence Intervals. GP = General Practitioner. KM = kilometer. MRS = Marginal Rate of Substitution. |                                                |                                               |                                                |                                               |                                                                                                                            |

**Table 9. Results of mixed logit models (IPW analyses)**

|                               |                                             | Breast cancer |                 |         | Cataract |                 |         |
|-------------------------------|---------------------------------------------|---------------|-----------------|---------|----------|-----------------|---------|
|                               |                                             | beta          | SE <sup>a</sup> | P value | beta     | SE <sup>a</sup> | P value |
| ASC <sup>b</sup>              |                                             | 0.826         | 0.067           | <0.01   | 0.580    | 0.067           | <0.01   |
| Attributes                    |                                             |               |                 |         |          |                 |         |
| 1) Patient experiences        | Below average (ref.)                        |               |                 |         |          |                 |         |
|                               | Average                                     | 0.826         | 0.100           | <0.01   | 1.045    | 0.087           | <0.01   |
|                               | Above average                               | 1.529         | 0.106           | <0.01   | 1.308    | 0.096           | <0.01   |
| 2) Clinical outcome indicator | Breast cancer:                              |               |                 |         |          |                 |         |
|                               | Tumor-positive resection margin (in %)      | -0.160        | 0.013           | <0.01   |          |                 |         |
| Cataract:                     | Per-operatively performed vitrectomy (in %) |               |                 |         | -3.222   | 0.228           | <0.01   |
| 3) Waiting time               | (In working days)                           | -0.058        | 0.004           | <0.01   | -0.016   | 0.002           | <0.01   |
| 4) Travel distance            | 3 km (ref.)                                 |               |                 |         |          |                 |         |
|                               | 8 km                                        | -0.357        | 0.071           | <0.01   | -0.170   | 0.071           | 0.02    |
|                               | 15 km                                       | -0.381        | 0.072           | <0.01   | -0.671   | 0.096           | <0.01   |
| 5) Recommendation             | Nobody (ref.)                               |               |                 |         |          |                 |         |
|                               | Friends and Family                          | 0.669         | 0.091           | <0.01   | -0.068   | 0.070           | 0.33    |
|                               | GP                                          | 1.247         | 0.102           | <0.01   | 0.575    | 0.089           | <0.01   |

|                                                                                                                                                                                                                                                                                                                                                                                                                                                                                                                                                                                                                                                                                       |                                             |          |       |       |          |       |       |
|---------------------------------------------------------------------------------------------------------------------------------------------------------------------------------------------------------------------------------------------------------------------------------------------------------------------------------------------------------------------------------------------------------------------------------------------------------------------------------------------------------------------------------------------------------------------------------------------------------------------------------------------------------------------------------------|---------------------------------------------|----------|-------|-------|----------|-------|-------|
| SD of random parameters                                                                                                                                                                                                                                                                                                                                                                                                                                                                                                                                                                                                                                                               |                                             |          |       |       |          |       |       |
| 1) Patient experiences                                                                                                                                                                                                                                                                                                                                                                                                                                                                                                                                                                                                                                                                | Average                                     | -0.800   | 0.131 | <0.01 | -0.327   | 0.170 | 0.05  |
|                                                                                                                                                                                                                                                                                                                                                                                                                                                                                                                                                                                                                                                                                       | Above average                               | 0.784    | 0.136 | <0.01 | -0.854   | 0.119 | <0.01 |
| 2) Clinical outcome indicator                                                                                                                                                                                                                                                                                                                                                                                                                                                                                                                                                                                                                                                         |                                             |          |       |       |          |       |       |
| Breast cancer:                                                                                                                                                                                                                                                                                                                                                                                                                                                                                                                                                                                                                                                                        | Tumor-positive resection margin (in %)      | 0.201    | 0.014 | <0.01 |          |       |       |
| Cataract:                                                                                                                                                                                                                                                                                                                                                                                                                                                                                                                                                                                                                                                                             | Per-operatively performed vitrectomy (in %) |          |       |       | 3.071    | 0.207 | <0.01 |
| 3) Waiting time (in working days)                                                                                                                                                                                                                                                                                                                                                                                                                                                                                                                                                                                                                                                     |                                             | -0.071   | 0.005 | <0.01 | -0.026   | 0.003 | <0.01 |
| 4) Travel distance                                                                                                                                                                                                                                                                                                                                                                                                                                                                                                                                                                                                                                                                    | 8 km                                        |          |       |       | 0.042    | 0.114 | 0.71  |
|                                                                                                                                                                                                                                                                                                                                                                                                                                                                                                                                                                                                                                                                                       | 15 km                                       |          |       |       | 1.134    | 0.135 | <0.01 |
| 5) Recommendation                                                                                                                                                                                                                                                                                                                                                                                                                                                                                                                                                                                                                                                                     | Friends and Family                          | 0.875    | 0.137 | <0.01 | 0.061    | 0.138 | 0.66  |
|                                                                                                                                                                                                                                                                                                                                                                                                                                                                                                                                                                                                                                                                                       | GP                                          | -0.519   | 0.159 | <0.01 | -0.907   | 0.113 | <0.01 |
| Number of individuals                                                                                                                                                                                                                                                                                                                                                                                                                                                                                                                                                                                                                                                                 |                                             | 631      |       |       | 1109     |       |       |
| Number of observations                                                                                                                                                                                                                                                                                                                                                                                                                                                                                                                                                                                                                                                                |                                             | 6304     |       |       | 10980    |       |       |
| Model fit                                                                                                                                                                                                                                                                                                                                                                                                                                                                                                                                                                                                                                                                             | Log-likelihood                              | -2889.21 |       |       | -4514.39 |       |       |
|                                                                                                                                                                                                                                                                                                                                                                                                                                                                                                                                                                                                                                                                                       | BIC                                         | 5909.65  |       |       | 9186.95  |       |       |
| <p>All random parameters were assumed to be normally distributed and were simulated using on 5,000 Modified Latin Hypercube Sampling draws. <sup>a</sup> = reflects bootstrapped standard errors. <sup>b</sup> = coded as 1 for the first (left) alternative and 0 for the second alternative. The coefficient reflects the utility derived from any given hospital presented on left hand side of the choice set and thus accounted for any left-to-right bias.</p> <p>ASC = alternative specific constant. BIC = Bayesian information criterion. GP = General Practitioner. KM = kilometer. NA = not available. Ref. = Reference. SD = Standard deviation. SE = Standard error.</p> |                                             |          |       |       |          |       |       |

**Table 10. Marginal rate of substitution (IPW analyses)**

|                                                                                                                                                                            | Breast cancer                                  |                                               | Cataract                                       |                                               | Interpretation                                                                                                             |
|----------------------------------------------------------------------------------------------------------------------------------------------------------------------------|------------------------------------------------|-----------------------------------------------|------------------------------------------------|-----------------------------------------------|----------------------------------------------------------------------------------------------------------------------------|
|                                                                                                                                                                            | Marginal willingness to wait (in working days) | 95%CI (lower bound; upper bound) <sup>a</sup> | Marginal willingness to wait (in working days) | 95%CI (lower bound; upper bound) <sup>a</sup> | To select a hospital that...                                                                                               |
| Attributes                                                                                                                                                                 |                                                |                                               |                                                |                                               |                                                                                                                            |
| 1) Patient experiences                                                                                                                                                     | 18.4                                           | (13.7-23.1)                                   | 84.1                                           | (66.0-102.2)                                  | ... scored above average on patient experiences instead of a hospital that scored below average on patient experiences.    |
| 2) Clinical outcome indicator                                                                                                                                              | 41.1                                           | (34.4-47.9)                                   |                                                |                                               | ... reported a 5% score on the 'tumor-positive resection margin' indicator instead of a hospital with a 20% score.         |
|                                                                                                                                                                            |                                                |                                               | 265.5                                          | (214.6-316.3)                                 | ... reported a 0.4% score on the 'per-operatively performed vitrectomy' indicator instead of a hospital with a 1.7% score. |
| 4) Travel distance                                                                                                                                                         | 2.6                                            | (0.2-5.0)                                     | 42.3                                           | (27.7-56.8)                                   | ... was located 3 km away from their home instead of a hospital located 15 km away.                                        |
| 5) Recommendation                                                                                                                                                          | 14.9                                           | (10.1-19.6)                                   | 36.6                                           | (23.5-49.6)                                   | ... was recommended by their GP instead of a hospital that was not recommended by anyone in particular.                    |
| <sup>a</sup> = computed using robust standard errors.<br>95%CI = 95% Confidence Intervals. GP = General Practitioner. KM = kilometer. MRS = Marginal Rate of Substitution. |                                                |                                               |                                                |                                               |                                                                                                                            |
